# Supplementary material for: Functionalized graphene oxide as an efficient adsorbent for CO2capture and support for heterogeneous catalysis
Source: Royal Society of Chemistry journal article supplement (doi:10.1039/c6ra13590k), 2016-01-01
Supplement: c6ra13590k1.pdf [file c6ra13590k1.pdf]

## Supporting Information

### Functionalized graphene oxide as an efficient adsorbent for CO<sub>2</sub> capture and support for heterogeneous catalysis

Piyali Bhanja, Sabuj Kanti Das, Astam Kumar Patra and Asim Bhaumik\*

*Department of Materials Science, Indian Association for the Cultivation of Science, Jadavpur,  
Kolkata-700 032, India,*

*\*Corresponding author. E-mail: msab@iacs.res.in*

#### Table of Contents

|            |                                                                                                                |          |
|------------|----------------------------------------------------------------------------------------------------------------|----------|
| Section S1 | FT-IR spectra of synthesized 2,6-diformyl-4-methylphenol                                                       | Page 2   |
| Section S2 | <sup>1</sup> H NMR spectrum of 2,6-diformyl-4-methylphenol                                                     | Page 3   |
| Section S3 | <sup>13</sup> C NMR spectrum of 2,6-diformyl-4-methylphenol                                                    | Page 4   |
| Section S4 | <sup>1</sup> H and <sup>13</sup> C NMR chemical shifts of different C-S coupling products reported in Table 1. | Page 5-7 |

**Section S1:** FT-IR spectra of synthesized 2,6-diformyl-4-methylphenol

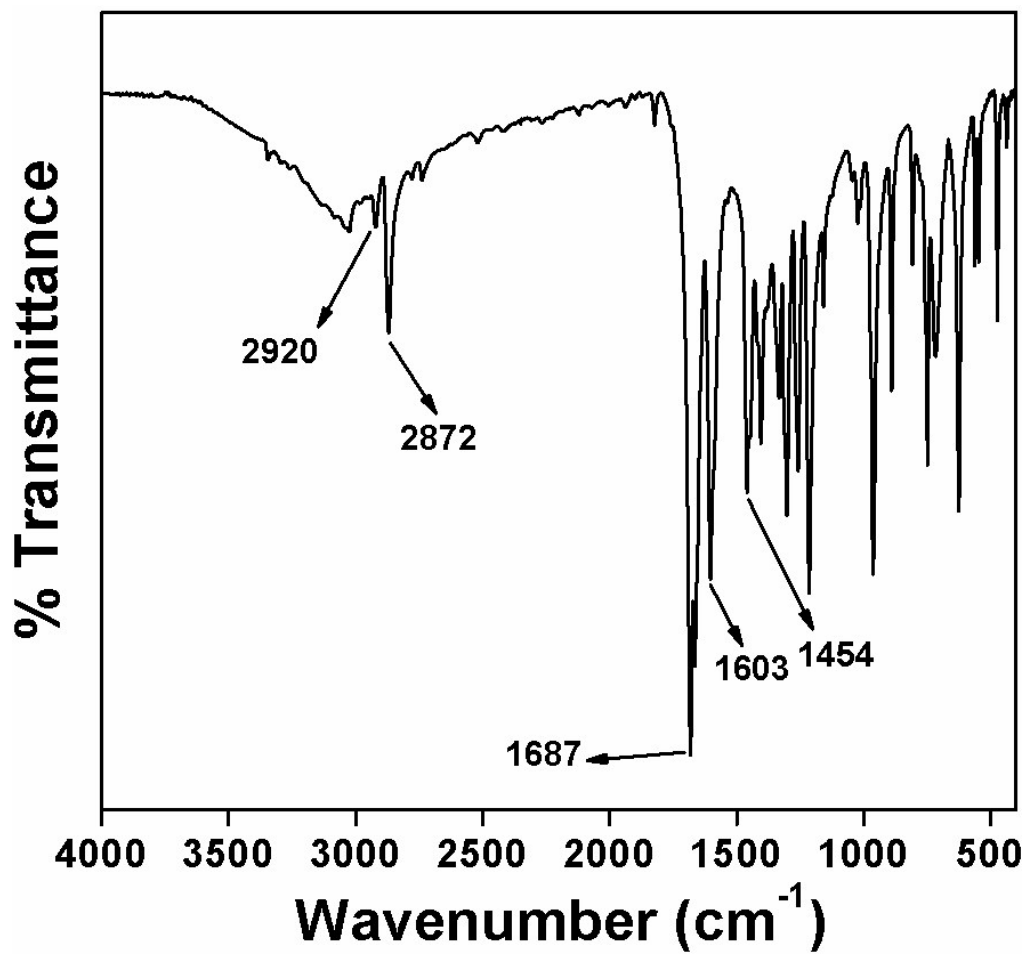

**Figure S1.** The FTIR spectrum of synthesized 2,6-diformyl-4-methylphenol.

**Section S2:**  $^1\text{H}$  NMR spectrum of 2,6-diformyl-4-methylphenol

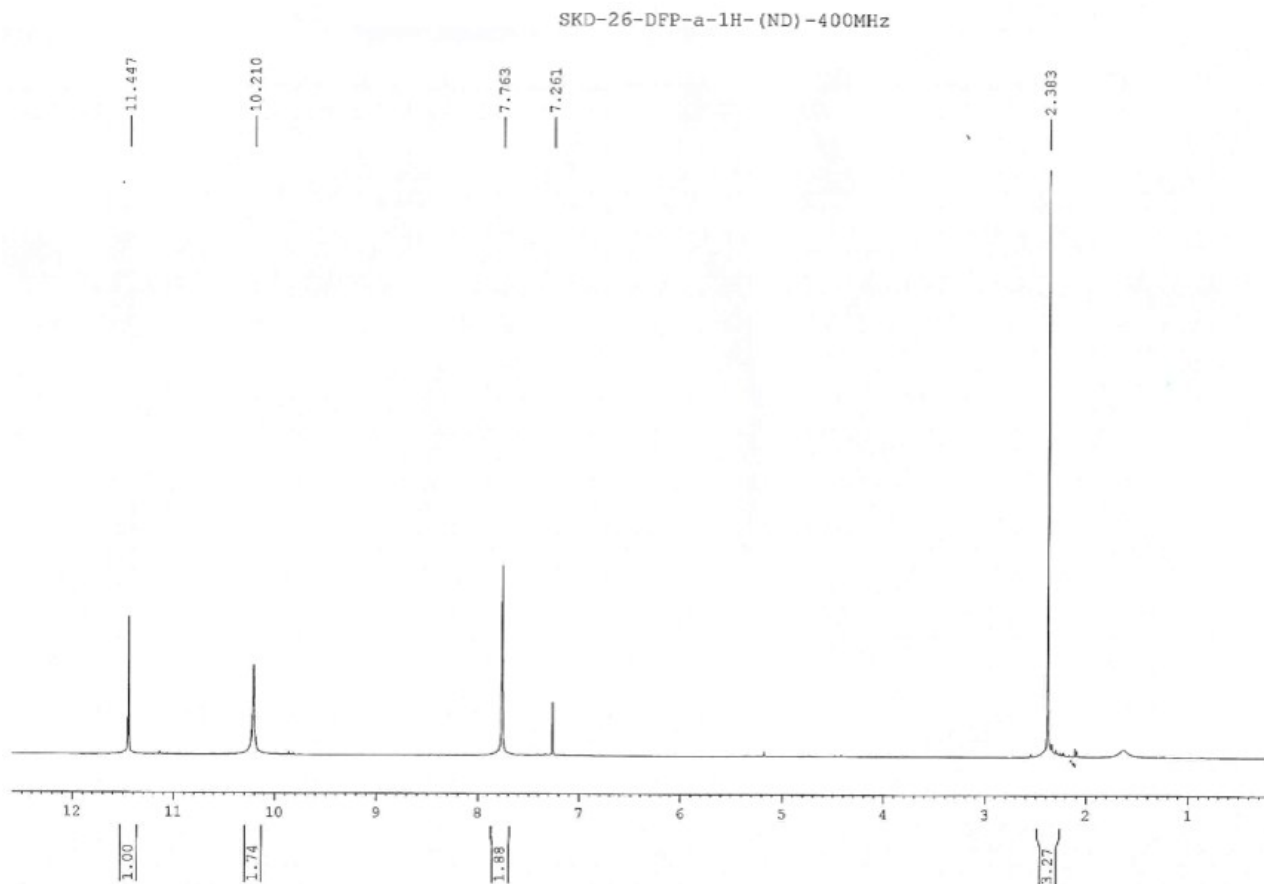

### Section S3: <sup>13</sup>C NMR spectrum of 2,6-diformyl-4-methylphenol

SKD-26-DEP-a-13C(SR) 400

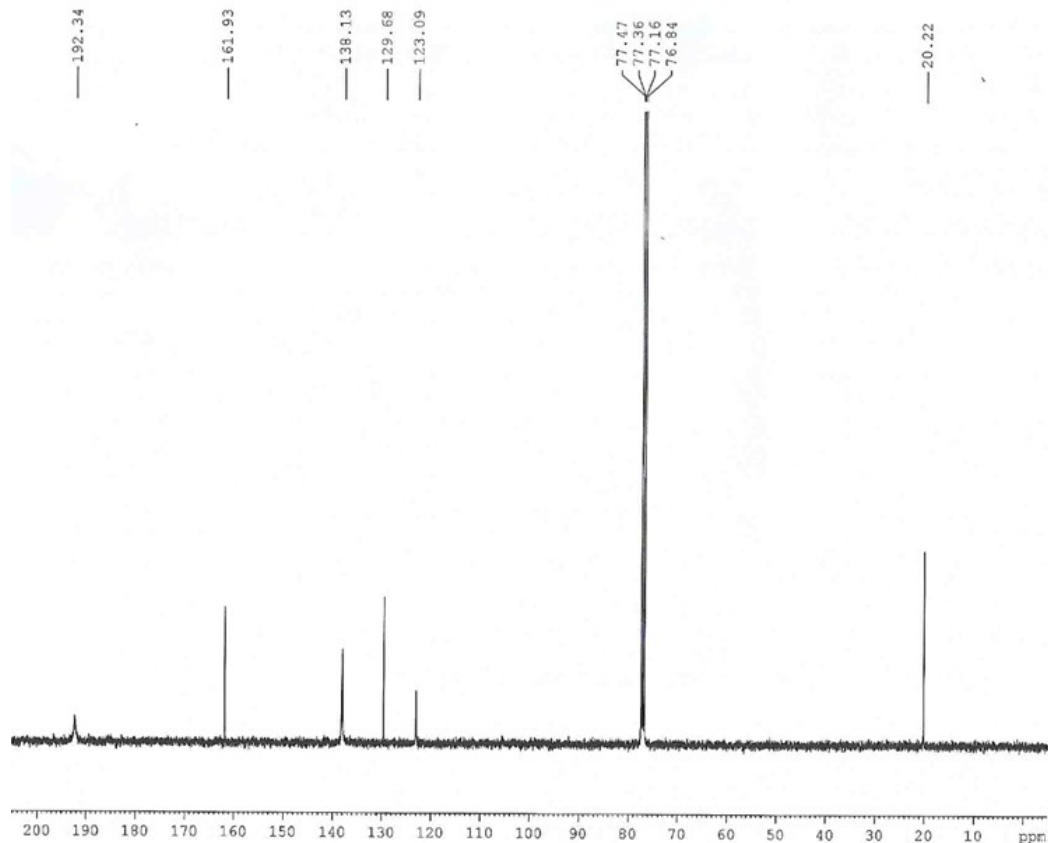

Current Data Parameters  
 NAME SKD-26-DEP-a-13C  
 EXPNO 1  
 PROCNO 1

F2 - Acquisition Parameters  
 Date\_ 20160503  
 Time 21.18  
 INSTRUM spect  
 PROBHD 5 mm PABBO BB/  
 PULPROG zgpg30  
 TD 32768  
 SOLVENT CDCl3  
 NS 2048  
 DS 4  
 SWH 24038.461 Hz  
 FIDRES 0.733596 Hz  
 AQ 0.6815744 sec  
 RG 203  
 DW 20.800 usec  
 DE 6.50 usec  
 TE 0 K  
 D1 2.00000000 sec  
 D11 0.03000000 sec  
 TDO 1

===== CHANNEL f1 =====  
 SFO1 100.6404326 MHz  
 NUC1 13C  
 P1 9.00 usec  
 PLW1 55.00000000 W

===== CHANNEL f2 =====  
 SFO2 400.2016008 MHz  
 NUC2 1H  
 CPDPRG2 waltz16  
 PCPD2 90.00 usec  
 PLW2 10.00000000 W  
 PLW12 0.29660001 W  
 PLW13 0.24025001 W

F2 - Processing parameters  
 SI 32768  
 SF 100.6303553 MHz  
 WDW EM  
 SSB 0  
 LB 1.00 Hz  
 GB 0  
 PC 1.40

## Section S1

### $^1\text{H}$ and $^{13}\text{C}$ NMR spectroscopic data of various C-S coupling products

**Table 1, entry 1: Benzyl 4-methylphenyl sulfide**

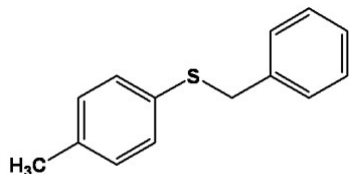

$^1\text{H}$  NMR (300 MHz,  $\text{CDCl}_3$ )  $\delta$  7.51-7.49 (2H, d,  $J=9$  Hz), 7.30-7.22 (5H, m), 6.88-6.83 (2H, d,  $J=9$  Hz), 3.57 (2H, s), 2.23 (3H, s);  $^{13}\text{C}$  NMR (75 MHz,  $\text{CDCl}_3$ )  $\delta$  138.1, 137.3, 131.5, 129.4, 128.7, 128.1, 127.0, 126.7, 35.1, 21.2.

**(Table 1, entry 2): Benzyl 2-methylphenyl sulfide**

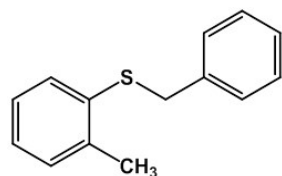

$^1\text{H}$  NMR (300 MHz,  $\text{CDCl}_3$ )  $\delta$  7.51-7.26 (4H, m), 7.35-7.22 (5H, m), 3.61 (2H, s), 2.65 (3H, S);  $^{13}\text{C}$  NMR (75 MHz,  $\text{CDCl}_3$ )  $\delta$  137.8, 136.9, 133.3, 132.2, 128.7, 127.4, 127.3, 126.0, 125.0, 38.8, 19.9

**(Table 1, entry 3): Benzyl phenyl sulfide**

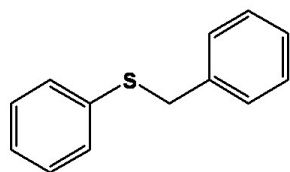

$^1\text{H}$  NMR (300 MHz,  $\text{CDCl}_3$ )  $\delta$  7.77-7.76 (1H, d,  $J=9$  Hz), 7.36-7.14 (7H, m), 7.28 (2H, t), 3.65 (2H, s);  $^{13}\text{C}$  NMR (75 MHz,  $\text{CDCl}_3$ )  $\delta$  138.1, 137.7, 130.0, 129.2, 128.5, 128.7, 127.2, 126.1, 43.7.

**(Table 1, entry 4): Benzyl 4-nitrophenyl sulfide**

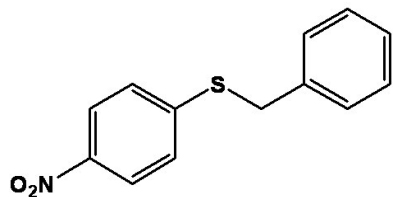

$^1\text{H}$  NMR (300 MHz,  $\text{CDCl}_3$ )  $\delta$  7.87-7.84 (4H, m), 7.31-7.20 (5H, m), 3.59 (2H, s);  $^{13}\text{C}$  NMR (75 MHz,  $\text{CDCl}_3$ )  $\delta$  147.2, 138.6, 137.3, 129.7, 128.3, 127.6, 127.0, 125.4, 35.7

**(Table 1, entry 5): Benzyl 4-cyanophenyl sulfide**

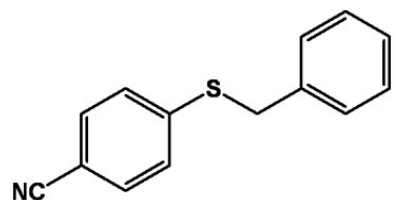

$^1\text{H}$  NMR (300 MHz,  $\text{CDCl}_3$ )  $\delta$  7.62-7.58 (2H, d,  $J=6$  Hz), 7.43-7.40 (2H, d,  $J=6$  Hz), 7.27-7.16 (5H, m), 3.56 (2H, s);  $^{13}\text{C}$  NMR (75 MHz,  $\text{CDCl}_3$ )  $\delta$  138.4, 136.9, 133.5, 129.4, 129.0, 128.9, 128.2, 127.6, 118.0, 111.2, 35.7.

**Benzyl 4-methoxyphenyl sulfide (Table 1, entry 6):**

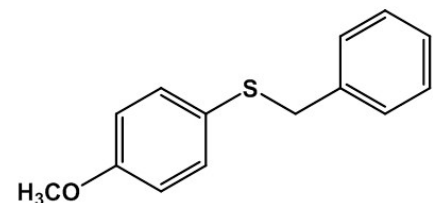

$^1\text{H}$  NMR (300 MHz,  $\text{CDCl}_3$ )  $\delta$  7.55-7.49 (2H, d,  $J=9$  Hz), 7.29-7.22 (5H, m), 6.68-6.63 (2H, d,  $J=9$  Hz), 3.65 (3H, s), 3.52 (2H, s);  $^{13}\text{C}$  NMR (75 MHz,  $\text{CDCl}_3$ )  $\delta$  159.6, 138.1, 129.4, 128.9, 128.3, 127.0, 126.5, 116.2, 55.9, 35.8.

**(Table 5, entry 7): 3-thiobenzyl Benzyl alcohol**

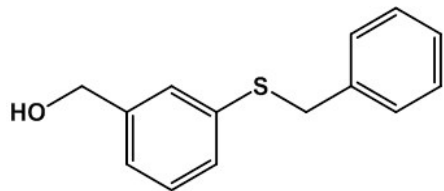

<sup>1</sup>H NMR (300 MHz, CDCl<sub>3</sub>) δ 7.16-7.02 (9H, m), 4.46 (2H, s), 3.45 (2H, s); <sup>13</sup>C NMR (75 MHz, CDCl<sub>3</sub>) δ 143.2, 137.5, 134.6, 129.4, 128.2, 128.0, 127.6, 126.4, 126.0, 124.4, 63.6, 35.9

**(Table 1, entry 9): Benzyl 4-formylphenyl sulfide**

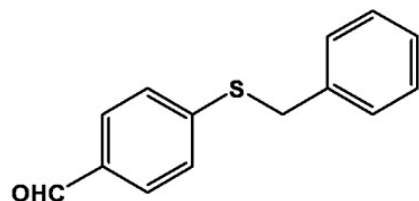

<sup>1</sup>H NMR (300 MHz, CDCl<sub>3</sub>) δ 9.82 (1H, s), 7.60-7.50 (3H, q), 7.22-7.10 (6H, m), 3.44 (2H, s); <sup>13</sup>C NMR (75 MHz, CDCl<sub>3</sub>) δ 190.8, 138.2, 137.3, 135.0, 130.9, 129.8, 129.3, 128.1, 127.0, 35.6
